# Supplementary material for: Molecular dynamics simulations predict an accelerated dissociation of H2CO3at the air–water interface
Source: Royal Society of Chemistry journal article supplement (doi:10.1039/c4cp03302g), 2014-01-01
Supplement: c4cp03302g1.pdf [file c4cp03302g1.pdf]

**Supporting Information for Molecular Dynamics  
Simulations Predict an Accelerated Dissociation of  
 $\text{H}_2\text{CO}_3$  at the Air-Water Interface**

Mirza Galib\* and Gabriel Hanna\*

*Department of Chemistry, University of Alberta, Edmonton, Alberta, Canada*

E-mail: mgalib@ualberta.ca; gabriel.hanna@ualberta.ca

---

\*To whom correspondence should be addressed

# Metadynamics

We employed metadynamics and CPMD to calculate the dissociation energy barrier of  $\text{H}_2\text{CO}_3$  for configuration B2. The metadynamics calculations were carried out using the PLUMED package<sup>1</sup> (version 1.3.0) and the CPMD package<sup>2</sup> (version 3.15.1). We used the direct Lagrangian version of metadynamics,<sup>3</sup> in which the Lagrangian,  $L_{MTD}$ , has the following form:

$$L_{MTD} = L_{CP} - V(t, s), \quad (1)$$

where  $L_{CP}$  is the CPMD Lagrangian and  $V(t, s)$  is the history-dependent biasing potential acting on the collective variables (CVs), which is given by

$$V(t, s) = W \sum_i \exp\left\{-\frac{(s - s^i)^2}{2(\Delta s^i)^2}\right\}. \quad (2)$$

In the above equation,  $W$  is the Gaussian height,  $s = \{s_1, s_2, \dots\}$  is the vector of CVs,  $s^i$  is a vector of the values of the CVs at metadynamics step  $i$ , and  $\Delta s^i$  is the Gaussian width. When all of the potential wells have been filled with these Gaussians, the total biasing potential added gives an estimate of the free energy as a function of the fictitious particle coordinates, i.e.,

$$F(s) = -\lim_{t \rightarrow \infty} V(t, s). \quad (3)$$

## Parameters

The parameters associated with the various CVs used in our metadynamics simulations are summarized in the following table:

|                                           | CV <sub>1</sub> | CV <sub>2</sub> |
|-------------------------------------------|-----------------|-----------------|
| Gaussian height, $W$ (hartee)             | 0.0002          | 0.0002          |
| Gaussian width, $\Delta s'$               | 0.02            | 0.05            |
| Metadynamics time step, $\Delta t$ (a.u.) | 200             | 200             |
| $p$                                       | 6               | 8               |
| $q$                                       | 24              | 24              |
| $d_0$ (Å)                                 | 1.60            | 1.20            |
| $\lambda$                                 | -               | 20              |

**Table 1: Metadynamics parameters for the dissociation of H<sub>2</sub>CO<sub>3</sub>.**

## Error estimation

We estimated an error bar of 1.5 kcal/mol in our metadynamics simulations using the procedure given in Refs.<sup>4</sup> and.<sup>5</sup> It should be noted that the size of the error bars may be reduced by decreasing the height of the Gaussian hills and the frequency at which they are added, at the cost of increasing the simulation time. Some possible sources of error in these types of simulations have already been discussed in Ref.<sup>6</sup>

## References

- (1) Bonomi, M.; Branduardi, D.; Bussi, G.; Camilloni, C.; Provasi, D.; Raiteri, P.; Donadio, D.; Marinelli, F.; Pietrucci, F.; Broglia, R.; Parrinello, M. PLUMED: A Portable Plugin for Free-Energy Calculations with Molecular Dynamics. *Comp. Phys. Comm.* **2009**, *180*, 1961–1972.
- (2) CPMD V3.13.2. Copyright IBM Corp 1990-2008, Copyright MPI fur Festkorperforschung Stuttgart 1997-2001.
- (3) Laio, A.; Parrinello, M. Escaping Free Energy Minima. *Proc. Natl. Acad. Sci. USA* **2002**, *99*, 12562.
- (4) Laio, A.; Gervasio, F. L. Metadynamics: A Method to Simulate Rare Events and Reconstruct the Free Energy in Biophysics, Chemistry and Material Science. *Rep. Prog. Phys.* **2008**, *71*, 126601–126622.
- (5) Bussi, G.; Laio, A.; Parrinello, M. Equilibrium Free Energies from Nonequilibrium Metadynamics. *Phys. Rev. Lett.* **2006**, *96*, 090601.
- (6) Stirling, A.; Papai, I.  $\text{H}_2\text{CO}_3$  Forms via  $\text{HCO}_3^-$  in Water. *J. Phys. Chem. B* **2010**, *114*(50), 16854–16859.
